# Supplementary material for: Changing Physical Activity Behavior in Type 2 Diabetes
Source: Oxford University Press journal article supplement (doi:10.2337/dc11-2452), 2012-11-14

SUPPLEMENTARY DATA

**Supplementary Table 1.** Search strategy for PsycINFO

|     |                                                                  |
|-----|------------------------------------------------------------------|
| 1.  | Exp diabetes mellitus                                            |
| 2.  | (type 2 diab* or T2D or T2DM or Type II Diab*).tw.               |
| 3.  | non-insulin dependent diabetes mellitus                          |
| 4.  | (non insulin dependent diabetes mellitus or NIDDM).tw.           |
| 5.  | (insulin dependent diab* or insulin-dependent diab* or IDDM).tw. |
| 6.  | 1 or 2 or 3 or 4 or 5                                            |
| 7.  | exp exercise/                                                    |
| 8.  | exp physical activity                                            |
| 9.  | exp recreation                                                   |
| 10. | 7 or 8 or 9                                                      |
| 11. | 6 and 10                                                         |

SUPPLEMENTARY DATA

**Supplementary Table 2.** Summary of Included RCTs

| Study ID, country of origin and setting                                             | Details of Sample                                                                                                                                                                                              | Details of Intervention(s)                                                                                                                                                                                                                                                                                                                                                                                                                                                                                                                                          | Mode of delivery                                                                            | Interventionist                                                                                             | Assessment periods               | Outcome Measures                                                                                         |
|-------------------------------------------------------------------------------------|----------------------------------------------------------------------------------------------------------------------------------------------------------------------------------------------------------------|---------------------------------------------------------------------------------------------------------------------------------------------------------------------------------------------------------------------------------------------------------------------------------------------------------------------------------------------------------------------------------------------------------------------------------------------------------------------------------------------------------------------------------------------------------------------|---------------------------------------------------------------------------------------------|-------------------------------------------------------------------------------------------------------------|----------------------------------|----------------------------------------------------------------------------------------------------------|
| Balducci et al 2010 <sup>21</sup><br><br>Italy<br><br>Diabetes Outpatient Clinic    | N = 606<br><br>% male = 58%<br><br>Mean age (SD): 58.8 years (8.6)<br><br>Time since diagnosis: average of 6 years<br><br>Management: Diet +/- Oral hypoglycaemic agent (OHA) = 88%<br>Insulin = 12%           | Intervention: Supervised aerobic and resistance exercise sessions and structured counselling targeting physical activity<br><br>n=303<br><br>Duration: 12 months<br><br>Intensity: Two supervised sessions per week for 12 months and structured counselling targeting physical activity (reinforced every three months)<br><br>Supervized PA/Exercise Component: Yes<br><br>Theory: Social Cognitive Theory<br><br>Usual care: n=303                                                                                                                               | Individual face to face sessions                                                            | Physicians and exercise specialists                                                                         | Baseline and 12 months           | HbA1c<br><br>Self-reported physical activity: MET-h/wk (Minnesota Leisure Time Questionnaire)<br><br>BMI |
| Balducci et al 2010 <sup>22</sup><br><br>Italy<br><br>Setting not explicitly stated | N = 82<br><br>% Male = 59%<br><br>Mean age range: 60.6 to 64.3<br><br>Time Since Diagnosis: on average this ranged from 7.8 to 10.1 years<br><br>Management: Diet = not reported<br>OHA = 80%<br>Insulin = 15% | Usual care (Group A): n=20<br><br>Intervention (Group B): Structured exercise counselling to perform aerobic physical activity of low-intensity<br><br>n=20<br><br>Intensity: Not reported<br><br>Intervention (Group C): Structured exercise counselling and supervised aerobic exercise<br><br>n=20<br><br>Intensity: Supervised aerobic exercise (60 minutes; 70-80% Vo2Max) twice per week. Intensity of structured counselling was not reported.<br><br>Intervention (Group D): Structured exercise counselling and supervised aerobic and resistance exercise | Individual face to face sessions (Groups, A, B, C & D)<br><br>Group sessions (Groups C & D) | Physician-delivered counseling<br><br>It was unclear who supervised the exercise sessions in groups C and D | Baseline, 3, 6, 9, and 12 months | HbA1c<br><br>Self-reported physical activity: MET-h/wk (Minnesota Leisure Time Questionnaire)<br><br>BMI |

SUPPLEMENTARY DATA

|                                                                                             |                                                                                                                                                                                                                    |                                                                                                                                                                                                                                                                                                                                                                                                                       |                |                                                                     |                               |                                                                                                                          |
|---------------------------------------------------------------------------------------------|--------------------------------------------------------------------------------------------------------------------------------------------------------------------------------------------------------------------|-----------------------------------------------------------------------------------------------------------------------------------------------------------------------------------------------------------------------------------------------------------------------------------------------------------------------------------------------------------------------------------------------------------------------|----------------|---------------------------------------------------------------------|-------------------------------|--------------------------------------------------------------------------------------------------------------------------|
|                                                                                             |                                                                                                                                                                                                                    | <p>n=22</p> <p>Intensity: Supervized aerobic (40 minutes; 70-80% Vo2Max) and resistance (20 minutes; 1 repetition maximum) exercise twice per week. Intensity of structured counselling was not reported.</p> <p>Duration: 12 months</p> <p>Supervized PA/Exercise Component: Yes (Groups C and D)</p> <p>Theory: Social Cognitive Theory (groups B, C and D)</p>                                                     |                |                                                                     |                               |                                                                                                                          |
| <p>Cheung et al 2009<sup>23</sup></p> <p>Australia</p> <p>Setting not explicitly stated</p> | <p>N = 40</p> <p>% Male = 32%</p> <p>Mean age = 59 years (intervention group) and 62 years (usual care)</p> <p>Time Since Diagnosis: Not reported</p> <p>Management: Diet = 8% OHA = 62% Insulin +/- OHA = 30%</p> | <p>Intervention: Supervized resistance exercise with Dynabands, which was continued at home</p> <p>n=21</p> <p>Duration: 16 weeks</p> <p>Intensity: Five supervised sessions fortnightly for the first month (and monthly for the remainder of the study) with an additional 30 minutes at home 5 days per week.</p> <p>Supervized PA/Exercise Component: Yes</p> <p>Theory: Not reported</p> <p>Usual care: n=19</p> | Group sessions | Fitness leaders and an exercise physiologist                        | Baseline and 4 months         | <p>HbA1c</p> <p>Self-reported physical activity: minutes/wk (Active Australia Questionnaire)</p> <p>BMI</p>              |
| <p>De Greef et al 2010<sup>24</sup></p> <p>Belgium</p> <p>Endocrinology Department</p>      | <p>N = 41</p> <p>% Male = 68%</p> <p>Age range: 35 to 75 years</p> <p>Time Since Diagnosis: 1 to 5 years (n=16) and ≥ 5 years (n=25)</p> <p>Management: not reported</p>                                           | <p>Intervention: 12-week lifestyle intervention consisting of five cognitive-behavioural group sessions of 90 minutes duration</p> <p>n=21</p> <p>Duration: 12 weeks</p> <p>Intensity: Five sessions over 12 weeks and one booster session at 23 weeks</p> <p>Supervized PA/Exercise Component: No</p> <p>Theory: Cognitive Behavioural Therapy &amp;</p>                                                             | Group sessions | A physical education movement scientist and a clinical psychologist | Baseline, 12 weeks and 1 year | <p>HbA1c</p> <p>Objectively assessed physical activity: Accelerometer minutes/day and pedometer steps/day</p> <p>BMI</p> |

SUPPLEMENTARY DATA

|                                   |                                                                        | Motivational Interviewing                                                                                                                                      |                                                           |                                                      |                               |                                                                                                                                                                                                |
|-----------------------------------|------------------------------------------------------------------------|----------------------------------------------------------------------------------------------------------------------------------------------------------------|-----------------------------------------------------------|------------------------------------------------------|-------------------------------|------------------------------------------------------------------------------------------------------------------------------------------------------------------------------------------------|
| De Greef et al 2011 <sup>25</sup> | N = 67                                                                 | Usual care: n=20                                                                                                                                               |                                                           |                                                      |                               |                                                                                                                                                                                                |
| Belgium                           | % Male = 50%                                                           | Intervention (Group 1): Individualised physical activity consultation using behavioral strategies                                                              | Group 1: Individual face to face sessions                 | Group 1: A General Practitioner                      | Baseline and 12 weeks         | HbA1c                                                                                                                                                                                          |
| Primary Care                      | Mean age (SD) = 67.4 (9.3)                                             | n=22                                                                                                                                                           | Group 2: Group sessions                                   | Group 2: A Behavioral Expert (Clinical Psychologist) |                               | Objectively assessed physical activity: pedometer steps/day; and self-reported physical activity: minutes/day (self-report diaries)                                                            |
|                                   | Time Since Diagnosis: >5 years (64.5%) and <5years (35.5%)             | Intensity: Three 15 minute consultations (one session every three weeks)                                                                                       |                                                           |                                                      |                               | BMI                                                                                                                                                                                            |
|                                   | Management: OHA = 90.3% Combined OHA and insulin = 8.1% Insulin = 1.6% | Intervention (Group 2): Interactive group counselling targeting physical activity                                                                              |                                                           |                                                      |                               |                                                                                                                                                                                                |
|                                   |                                                                        | n=21                                                                                                                                                           |                                                           |                                                      |                               |                                                                                                                                                                                                |
|                                   |                                                                        | Intensity: Three 90 minute sessions (One session every three weeks)                                                                                            |                                                           |                                                      |                               |                                                                                                                                                                                                |
|                                   |                                                                        | Duration: 12 weeks                                                                                                                                             |                                                           |                                                      |                               |                                                                                                                                                                                                |
|                                   |                                                                        | Supervized PA/Exercise Component: No (both intervention groups)                                                                                                |                                                           |                                                      |                               |                                                                                                                                                                                                |
|                                   |                                                                        | Theory: Motivational Interviewing, Cognitive Behavioral Therapy & Social Cognitive Theory (both intervention groups)                                           |                                                           |                                                      |                               |                                                                                                                                                                                                |
|                                   |                                                                        | Usual care: n=24                                                                                                                                               |                                                           |                                                      |                               |                                                                                                                                                                                                |
| De Greef et al 2011 <sup>26</sup> | N = 92                                                                 | Intervention:                                                                                                                                                  | One individual face to face session and 7 telephone calls | Psychologist                                         | Baseline, 24 weeks and 1 year | HbA1c                                                                                                                                                                                          |
| Belgium                           | % Male = 69%                                                           | A pedometer-based behavioral modification program with telephone support targeting physical activity and sedentary behavior                                    |                                                           |                                                      |                               | Objectively assessed physical activity: pedometer steps/day; accelerometer minutes/day; and self-reported physical activity minutes/day (International Physical Activity Questionnaire [IPAQ]) |
| Endocrinology Department          | Mean age (SD); 62 (9.0) years                                          | n=60                                                                                                                                                           |                                                           |                                                      |                               |                                                                                                                                                                                                |
|                                   | Time Since Diagnosis: >5 years = 82%                                   | Duration: 24 weeks                                                                                                                                             |                                                           |                                                      |                               |                                                                                                                                                                                                |
|                                   | Management: Combination of oral medication and insulin = 44%           | Intensity: One 30 minute face to face session and a supportive telephone call every 2 weeks for the first 4 weeks and every 4 weeks for the following 20 weeks |                                                           |                                                      |                               |                                                                                                                                                                                                |
|                                   |                                                                        | Supervized PA/Exercise Component: No                                                                                                                           |                                                           |                                                      |                               |                                                                                                                                                                                                |
|                                   |                                                                        | Theory: Motivational Interviewing, Cognitive Behavioral Therapy & Social Cognitive Theory                                                                      |                                                           |                                                      |                               |                                                                                                                                                                                                |

SUPPLEMENTARY DATA

|                                                                                                                                      |                                                                                                                                                                                                                                      |                                                                                                                                                                                                                                                                                                                                                                                                                                                                                                                                                                                                                                                                                                                                                                                                                                                                                |                                              |                 |                                |                                                                                                                                                      |
|--------------------------------------------------------------------------------------------------------------------------------------|--------------------------------------------------------------------------------------------------------------------------------------------------------------------------------------------------------------------------------------|--------------------------------------------------------------------------------------------------------------------------------------------------------------------------------------------------------------------------------------------------------------------------------------------------------------------------------------------------------------------------------------------------------------------------------------------------------------------------------------------------------------------------------------------------------------------------------------------------------------------------------------------------------------------------------------------------------------------------------------------------------------------------------------------------------------------------------------------------------------------------------|----------------------------------------------|-----------------|--------------------------------|------------------------------------------------------------------------------------------------------------------------------------------------------|
|                                                                                                                                      |                                                                                                                                                                                                                                      | Usual care: n=32                                                                                                                                                                                                                                                                                                                                                                                                                                                                                                                                                                                                                                                                                                                                                                                                                                                               |                                              |                 |                                |                                                                                                                                                      |
| Di Loreto et al 2003 <sup>27</sup><br><br>Italy<br><br>Outpatient Diabetes Clinic                                                    | N=340<br><br>% Male = 47%<br><br>Mean age (SD); 61.6 years (intervention group); 62 years (usual care)<br><br>Time Since Diagnosis: mean 7.6 years<br><br>Management: Diet = 10% OHA = 76% Insulin = 14% Insulin and Metformin = 21% | Intervention: Structured counselling targeting physical activity<br><br>n=182<br><br>Duration: 2 years<br><br>Intensity: One 15 minute appointment every 3 months and one telephone call at one month following the first consultation<br><br>Supervised PA/Exercise Component: No<br><br>Theory: Social Cognitive Theory<br><br>Usual Care: n=158                                                                                                                                                                                                                                                                                                                                                                                                                                                                                                                             | Individual face to face sessions             | Physicians      | Baseline, 3 months and 2 years | HbA1c<br><br>Self-reported physical activity: hours/wk and METs per h/week (Modifiable Activity Questionnaire [MAQ])<br><br>BMI                      |
| Gram et al 2010 <sup>28</sup><br><br>Denmark<br><br>Nordic Walking: Outdoors on forest paths<br><br>Exercise Prescription: Gymnasium | N = 68<br><br>% Male = 54%<br><br>Mean age across groups ranged from 59 to 62 years<br><br>Time Since Diagnosis: Not reported<br><br>Management: Not reported                                                                        | Intervention (Group 1): Nordic Walking (NW)<br><br>n=22<br><br>Intensity: Participants trained twice per week for the first two months and once per week during the final 2 months. In total participants received between 25 and 27 sessions. Each supervised session lasted 45 minutes and included a 10-minute warm-up, 30 minutes of Nordic walking, and a 5-minute cool down. Participants were instructed to walk at a speed of at least moderate intensity (>40% of VO2max) continuously for a minimum of 30 minutes.<br><br>Intervention (Group 2): Exercise Prescription (EP)<br><br>n=24<br><br>Intensity: Participants trained twice per week for the first 2 months and once per week during the during the final 2 months. In total participants received between 25 and 27 sessions. Each supervised session lasted 45 minutes and included a 10-minute warm-up, | NW: Group sessions<br><br>EP: Group Sessions | Physiotherapist | Baseline, 4 and 12 months      | HbA1c<br><br>Self-reported physical activity: hours spent on physical activity and activities of daily living (unvalidated questionnaire)<br><br>BMI |

SUPPLEMENTARY DATA

|                                                                                              |                                                                                                                                                                  |                                                                                                                                                                                                                                                                                                                                                                                                                                                                                                                                                                                                                                                                                                                |                                  |                            |                       |                                                                                                                                         |
|----------------------------------------------------------------------------------------------|------------------------------------------------------------------------------------------------------------------------------------------------------------------|----------------------------------------------------------------------------------------------------------------------------------------------------------------------------------------------------------------------------------------------------------------------------------------------------------------------------------------------------------------------------------------------------------------------------------------------------------------------------------------------------------------------------------------------------------------------------------------------------------------------------------------------------------------------------------------------------------------|----------------------------------|----------------------------|-----------------------|-----------------------------------------------------------------------------------------------------------------------------------------|
|                                                                                              |                                                                                                                                                                  | <p>30 minutes of exercise and a 5-minute cool down. Training intensity was individually based; however, participants had to work continuously for a minimum of 30 minutes at a workload of at least moderate intensity (&gt;40% of Vo2max). Prescription included both strength training and aerobic exercise.</p> <p>Duration: 4 months</p> <p>Supervised PA/Exercise Component: Yes (both NW and EP groups)</p> <p>Theory: No</p> <p>Usual Care: n=22</p>                                                                                                                                                                                                                                                    |                                  |                            |                       |                                                                                                                                         |
| <p>Kim &amp; Kang 2006<sup>29</sup></p> <p>South Korea</p> <p>Outpatient Diabetes Clinic</p> | <p>N = 73</p> <p>% Male = 53%</p> <p>Mean age (SD); 55.1 (7.42) years</p> <p>Time Since Diagnosis: mean (SD) = 7.3 (6.05) years</p> <p>Management: OHA = 68%</p> | <p>Intervention (Group 1; Web-based): Stage-based physical activity counselling intervention for use by care providers</p> <p>n=28</p> <p>Intensity: Two clinic visits during the first 2 weeks and one further visit at the midpoint during the 12-week intervention period</p> <p>Intervention (Group 2; Printed Material): As above but in printed form</p> <p>n=22</p> <p>Intensity: Two clinic visits during the first 2 weeks and one further visit at the midpoint during the 12-week intervention period</p> <p>Duration: 12 weeks</p> <p>Supervised PA/Exercise Component: No (both intervention groups)</p> <p>Theory: Transtheoretical Model (both intervention groups)</p> <p>Usual Care: n=23</p> | Individual face to face sessions | Research Nurse             | Baseline and 12 weeks | <p>HbA1c</p> <p>Self-reported physical activity using a self report instrument adapted from a 7-day recall questionnaire: METs-h/wk</p> |
| <p>Kirk et al 2004<sup>30</sup></p> <p>UK</p>                                                | <p>N = 70</p> <p>% Male = 50%</p>                                                                                                                                | <p>Intervention: Counselling targeting physical activity</p> <p>n=35</p>                                                                                                                                                                                                                                                                                                                                                                                                                                                                                                                                                                                                                                       | Individual face to face sessions | Trained Research Assistant | BL, 6 and 12 months   | <p>HbA1c</p> <p>Objectively assessed physical</p>                                                                                       |

SUPPLEMENTARY DATA

|                                                   |                                                                                                                                                                                                                                |                                                                                                                                                                                                                                                                                                                                                                                                                                                                                                                                                                                                                                                                                                                                                                                                                                                                                                           |                                  |                               |                           |                                                                                                                                                                                    |
|---------------------------------------------------|--------------------------------------------------------------------------------------------------------------------------------------------------------------------------------------------------------------------------------|-----------------------------------------------------------------------------------------------------------------------------------------------------------------------------------------------------------------------------------------------------------------------------------------------------------------------------------------------------------------------------------------------------------------------------------------------------------------------------------------------------------------------------------------------------------------------------------------------------------------------------------------------------------------------------------------------------------------------------------------------------------------------------------------------------------------------------------------------------------------------------------------------------------|----------------------------------|-------------------------------|---------------------------|------------------------------------------------------------------------------------------------------------------------------------------------------------------------------------|
| Setting not explicitly reported                   | <p>Mean age (SD); 57.6 (7.9) years</p> <p>Time Since Diagnosis: Not reported</p> <p>Management: Not reported</p>                                                                                                               | <p>Duration: 6 months</p> <p>Intensity: Two face-to-face sessions and four follow-up telephone calls at 1, 3, 7 and 9 months</p> <p>Supervised PA/Exercise Component: No</p> <p>Theory: Transtheoretical Model</p> <p>Usual Care: n=35</p>                                                                                                                                                                                                                                                                                                                                                                                                                                                                                                                                                                                                                                                                |                                  |                               |                           | <p>activity: Accelerometer counts and self-reported physical activity using a 7-day recall questionnaire: minutes/ wk spent active</p> <p>BMI</p>                                  |
| Kirk et al 2009 <sup>31</sup><br>UK<br>University | <p>N = 134</p> <p>% Male = 49%</p> <p>Mean age ranged from 59.2 to 63.2 years</p> <p>Time Since Diagnosis on average ranged from 9.8 to 12.4 years</p> <p>Management: OHA = 54%<br/>Insulin = 10%<br/>OHA and insulin = 5%</p> | <p>Intervention (Group 1; Physical Activity Counseling in person): Two 30-minute one-to-one consultations at baseline and 6 months where written physical activity packs were given to participants and used by the researcher to discuss relevant topics during the consultation</p> <p>n=47</p> <p>Intensity: Two 30 minute sessions and four 5-10 minute telephone calls at 1, 3, 6 and 9 months</p> <p>n=47</p> <p>Intervention group 2; Physical Activity Counseling in written form: A written physical activity pack was given to participants to work through in their own time</p> <p>n=52</p> <p>Intensity: Two 30 minute sessions and three 5-10 minute telephone calls at 1, 3, 6 and 9 months</p> <p>Duration: 12 months</p> <p>Supervised PA/Exercise Component: No (both intervention groups)</p> <p>Theory: Transtheoretical Model (both intervention groups)</p> <p>Usual Care: n=35</p> | Individual face to face sessions | Trained Research Assistant    | Baseline, 6 and 12 months | <p>HbA1c</p> <p>Objectively assessed physical activity: Accelerometer counts/ wk and self-reported physical activity using a 7-day recall questionnaire: minutes/wk</p> <p>BMI</p> |
| Ligtenberg et al 1997 <sup>32</sup>               | N = 58                                                                                                                                                                                                                         | Intervention: A 4-phase physical training programme                                                                                                                                                                                                                                                                                                                                                                                                                                                                                                                                                                                                                                                                                                                                                                                                                                                       | Group sessions                   | Physician and physiotherapist | Baseline, 6, 12 and 26    | HbA1c                                                                                                                                                                              |

SUPPLEMENTARY DATA

|                                                                                                                          |                                                                                                                                                                                                                                                                        |                                                                                                                                                                                                                                                                                                                                                                                                                                                                                                                         |                                                                                                |                                                                                                    |                                     |                                                                                                                          |
|--------------------------------------------------------------------------------------------------------------------------|------------------------------------------------------------------------------------------------------------------------------------------------------------------------------------------------------------------------------------------------------------------------|-------------------------------------------------------------------------------------------------------------------------------------------------------------------------------------------------------------------------------------------------------------------------------------------------------------------------------------------------------------------------------------------------------------------------------------------------------------------------------------------------------------------------|------------------------------------------------------------------------------------------------|----------------------------------------------------------------------------------------------------|-------------------------------------|--------------------------------------------------------------------------------------------------------------------------|
| <p>Netherlands</p> <p>Setting not reported for supervised exercise</p> <p>Participants continued to exercise at home</p> | <p>% Male = 34%</p> <p>Mean age (SD); 61 (5.0) for usual care &amp; 63 years (5.0) for intervention group</p> <p>Time Since Diagnosis: mean (SD) = 9.4 years (7.3) for control group &amp; 6.6 years (4.6) for intervention group</p> <p>Management: Insulin = 34%</p> | <p>n=30</p> <p>Duration: 26 weeks</p> <p>Intensity: Prior to training at home, study participants trained together three times per week for 6 weeks under direct supervision. In addition they received a telephone call once every two weeks over a 6 week period</p> <p>Supervised PA/Exercise Component: Yes</p> <p>Theory: Not explicitly stated</p> <p>Usual Care: n=28</p>                                                                                                                                        |                                                                                                |                                                                                                    | <p>weeks</p>                        | <p>Self-reported physical activity using a validated questionnaire</p>                                                   |
| <p>Plotnikoff et al 2010<sup>33</sup></p> <p>Canada</p> <p>Diabetes Clinics &amp; Community</p>                          | <p>N=48</p> <p>% Male = 33%</p> <p>Mean age = 55 years (intervention) and 54 years (usual care)</p> <p>Time Since Diagnosis: Not reported</p> <p>Management: Not reported</p>                                                                                          | <p>Intervention: Home-based resistance exercise three times per week</p> <p>n=27</p> <p>Duration: 16 weeks</p> <p>Intensity: During the first 2 weeks the exercise specialist supervised all three sessions. This was reduced to twice per week during weeks 3–4, once per week during weeks 5–8 and once biweekly during the last 8 weeks. In total the exercise specialist supervised 18 of 48 sessions</p> <p>Supervised PA/Exercise Component: Yes</p> <p>Theory: Not explicitly stated</p> <p>Usual care: n=21</p> | <p>Individual face to face sessions</p>                                                        | <p>Exercise specialist</p>                                                                         | <p>Baseline and 16 weeks</p>        | <p>HbA1c</p> <p>Self-reported physical activity: MET minutes/wk (Godin Leisure Time Questionnaire [GLTQ])</p> <p>BMI</p> |
| <p>Plotnikoff et al 2011<sup>34</sup></p> <p>Canada</p> <p>Community</p>                                                 | <p>N = 96</p> <p>% Male = 40%</p> <p>Mean age (SD); 60 (27-78) years</p> <p>Time Since Diagnosis: mean (SD) = 6 (9.8)</p>                                                                                                                                              | <p>Intervention: Diabetes Education Program (DEP) plus a supplemental theory based physical activity counselling intervention (DEPplusPAS)</p> <p>n=47</p> <p>Duration: 8 weeks</p> <p>Intensity: Eleven group sessions over the duration of the intervention period were delivered as part of the</p>                                                                                                                                                                                                                  | <p>DEP: group sessions</p> <p>Supplemental program (PAS): Individual face to face sessions</p> | <p>Diabetes Educator (DEP)</p> <p>Personal Trainer (DEPplusPAS)</p> <p>Nurse (Fitness testing)</p> | <p>Baseline, 3, 6 and 12 months</p> | <p>HbA1c</p> <p>Self-reported physical activity: MET minutes/wk (Godin Leisure Time Questionnaire [GLTQ])</p> <p>BMI</p> |



SUPPLEMENTARY DATA

|                                                                                     |                                                                                                                                                                                 |                                                                                                                                                                                                                                                                                                                                                                                                                                  |                                                      |                                                                                               |                           |                                                                                         |
|-------------------------------------------------------------------------------------|---------------------------------------------------------------------------------------------------------------------------------------------------------------------------------|----------------------------------------------------------------------------------------------------------------------------------------------------------------------------------------------------------------------------------------------------------------------------------------------------------------------------------------------------------------------------------------------------------------------------------|------------------------------------------------------|-----------------------------------------------------------------------------------------------|---------------------------|-----------------------------------------------------------------------------------------|
|                                                                                     | years<br>Management:<br>Not reported                                                                                                                                            | DEP. Two face-to-face sessions and 13 supportive telephone calls were provided concurrently as part of the supplementary programme. Telephone support was offered weekly for the first two months and bi weekly for 2.5 months<br><br>Supervised PA/Exercise Component: No<br><br>Theory: Social Cognitive Theory and Transtheoretical Model<br><br>Usual care: n=49                                                             |                                                      |                                                                                               |                           |                                                                                         |
| Samaras et al 1997 <sup>35</sup><br><br>Australia<br><br>Community Leisure Centre   | N = 26<br><br>% Male = 38%<br><br>Mean age = 60.5 years<br><br>Time Since Diagnosis: Not reported<br><br>Management: Diet and Metformin = 35% Sulfonyleurea = 39% Insulin = 27% | Intervention Group: 6 month exercise support group programme targeting physical activity<br><br>n=13<br><br>Duration: 6 months<br><br>Intensity: Monthly 1 hour sessions with the group facilitator and one other team member. The exercise sessions remained available to participants within the intervention group.<br><br>Supervised PA/Exercise Component: Yes<br><br>Theory: Precede-proceed Model<br><br>Usual Care: n=13 | Group exercise with individual face to face sessions | Nurse<br><br>Exercise physiologist<br><br>Dietician<br><br>Physician<br><br>Group facilitator | Baseline, 6 and 12 months | HbA1c<br><br>Self-reported physical activity: METs (validated questionnaire)<br><br>BMI |
| Tudor-Locke et al 2004 <sup>36</sup><br><br>Canada<br><br>Diabetes education centre | N = 60<br><br>% Male = 55%<br><br>Mean age (SD); 52.7 (5.2)<br><br>Time Since Diagnosis: Mean = 2.7 years<br><br>Management: Diet = 55.3% OHA = 47.4%                           | Intervention: The First Step Programme targeting everyday levels of physical activity<br><br>n=24<br><br>Duration: 16 weeks<br><br>Intensity: Four weekly group meetings for the first 4 weeks that included a group walk. Motivational postcards were mailed at 6 and at 10 weeks.<br><br>Supervised PA/Exercise Component: Yes<br><br>Theory: Social Cognitive Theory<br><br>Usual Care: n=23                                  | Group sessions                                       | Physical activity experts/diabetes educators                                                  | Baseline, 16 and 24 weeks | HbA1c<br><br>Objectively assessed physical activity: Pedometer steps/day                |
| Wisse et al                                                                         | N = 74                                                                                                                                                                          | Intervention: Personalized exercise prescription. An                                                                                                                                                                                                                                                                                                                                                                             | Individual face to                                   | Physical therapist                                                                            | Baseline, 1               | HbA1c                                                                                   |

SUPPLEMENTARY DATA

|                                                                             |                                                                                                                                                                                                                                 |                                                                                                                                                                                                                                                                                                                                                                                                                                                                                                                          |                      |  |                    |                                                                                               |
|-----------------------------------------------------------------------------|---------------------------------------------------------------------------------------------------------------------------------------------------------------------------------------------------------------------------------|--------------------------------------------------------------------------------------------------------------------------------------------------------------------------------------------------------------------------------------------------------------------------------------------------------------------------------------------------------------------------------------------------------------------------------------------------------------------------------------------------------------------------|----------------------|--|--------------------|-----------------------------------------------------------------------------------------------|
| <p>2010<sup>37</sup><br/>Netherlands<br/>Outpatient<br/>Diabetes Clinic</p> | <p>% Male = 51%</p> <p>Mean age (SD):<br/>54.3 years<br/>(intervention) and<br/>51.3 years (usual<br/>care)</p> <p>Time Since<br/>Diagnosis: Not<br/>reported</p> <p>Management:<br/>Exogenous insulin<br/>treatment (100%)</p> | <p>extended version of the Physician-based Assessment<br/>and Counselling for Exercise (PACE) project.</p> <p>n=38</p> <p>Duration: 2 years</p> <p>Intensity: Two 1-hour consultations with a physical<br/>therapist and a 15 minute telephone call at 2 and 6<br/>weeks. Over the 2-year follow-up period, a 30-minute<br/>consultation was alternated every 6 weeks with a 15<br/>minute telephone call.</p> <p>Supervised PA/Exercise Component: No</p> <p>Theory: Transtheoretical Model</p> <p>Usual Care: n=36</p> | <p>face sessions</p> |  | <p>and 2 years</p> | <p>Self-reported physical activity:<br/>METs/wk (Tecumseh/Minnesota<br/>Scale)</p> <p>BMI</p> |
|-----------------------------------------------------------------------------|---------------------------------------------------------------------------------------------------------------------------------------------------------------------------------------------------------------------------------|--------------------------------------------------------------------------------------------------------------------------------------------------------------------------------------------------------------------------------------------------------------------------------------------------------------------------------------------------------------------------------------------------------------------------------------------------------------------------------------------------------------------------|----------------------|--|--------------------|-----------------------------------------------------------------------------------------------|

SUPPLEMENTARY DATA

**Supplementary Table 3.** Methodological quality assessment and grading within and across studies

| Study ID                             | Power calculation (sample size achieved at final follow-up) | Attrition rate | Intention to treat | Methodological Quality Assessment |         |         |         |     |     | Risk of bias within studies | Outcomes                    |                             |                                 |         |         |
|--------------------------------------|-------------------------------------------------------------|----------------|--------------------|-----------------------------------|---------|---------|---------|-----|-----|-----------------------------|-----------------------------|-----------------------------|---------------------------------|---------|---------|
|                                      |                                                             |                |                    | A                                 | B       | C       | D       | E   | F   |                             | HbA1c                       | Objective physical activity | Self-reported physical activity | BMI     |         |
| Balducci et al 2010 <sup>21</sup>    | Yes (Yes)                                                   | n=43 (7.1%)    | Yes                | Yes                               | Yes     | Yes     | Yes     | Yes | Yes | Yes                         | Low                         | √                           | -                               | √       | √       |
| Balducci et al 2010 <sup>22</sup>    | Yes (Yes)                                                   | n=5 (6.1%)     | Yes                | Unclear                           | Unclear | Yes     | Yes     | Yes | Yes | Yes                         | Unclear                     | √                           | -                               | √       | √       |
| Cheung et al 2009 <sup>23</sup>      | NR (NR)                                                     | n=3 (8%)       | NR                 | Unclear                           | Unclear | Unclear | Yes     | Yes | Yes | Yes                         | Unclear                     | √                           | -                               | √       | √       |
| De Greef et al 2010 <sup>24</sup>    | Yes (No)                                                    | n=5 (12.2%)    | Yes                | Unclear                           | Yes     | Yes     | Yes     | Yes | Yes | Yes                         | Low                         | √                           | √                               | -       | √       |
| De Greef et al 2011 <sup>25</sup>    | Yes (No)                                                    | n=3 (4.5%)     | Yes                | Yes                               | Yes     | Yes     | Yes     | Yes | Yes | Yes                         | Low                         | √                           | √                               | √       | √       |
| De Greef et al 2011 <sup>26</sup>    | Yes (Yes)                                                   | n=4 (4.3%)     | Yes                | Unclear                           | Unclear | Unclear | Yes     | Yes | Yes | Yes                         | Unclear                     | √                           | √                               | √       | -       |
| Di Loreto et al 2003 <sup>27</sup>   | Yes (Yes)                                                   | n=3 (<1%)      | Yes                | Yes                               | Unclear | Unclear | Yes     | Yes | Yes | Yes                         | Unclear                     | √                           | -                               | √       | √       |
| Gram et al 2010 <sup>28</sup>        | Yes (Yes)                                                   | n=3 (4%)       | Yes                | Yes                               | Unclear | Unclear | Yes     | No  | Yes | Yes                         | Unclear                     | √                           | -                               | -       | √       |
| Kim & Kang 2006 <sup>29</sup>        | Yes (Yes)                                                   | NR             | No                 | Unclear                           | Unclear | Unclear | Unclear | Yes | Yes | Yes                         | Unclear                     | √                           | -                               | √       | -       |
| Kirk et al 2004 <sup>30</sup>        | Yes (Yes)                                                   | n=11 (16%)     | Yes                | Yes                               | Yes     | Unclear | Yes     | Yes | Yes | Yes                         | Unclear                     | √                           | √                               | √       | √       |
| Kirk et al 2009 <sup>31</sup>        | Yes (Yes)                                                   | n=18 (13%)     | Yes                | Yes                               | Yes     | Yes     | Yes     | Yes | Yes | Yes                         | Low                         | √                           | √                               | √       | √       |
| Ligtenberg et al 1997 <sup>32</sup>  | NR (NR)                                                     | n=7 (12%)      | NR                 | Unclear                           | Unclear | Unclear | Yes     | Yes | Yes | Yes                         | Unclear                     | √                           | -                               | √       | -       |
| Plotnikoff et al 2010 <sup>33</sup>  | Yes (Unclear)                                               | n=7 (14.6%)    | Yes                | Yes                               | Yes     | Yes     | Yes     | Yes | Yes | Yes                         | Low                         | √                           | -                               | √       | √       |
| Plotnikoff et al 2011 <sup>34</sup>  | Yes (Yes)                                                   | n=8 (8.3%)     | Yes                | Yes                               | Unclear | Unclear | Yes     | Yes | Yes | Yes                         | Unclear                     | √                           | -                               | √       | -       |
| Samaras et al 1997 <sup>35</sup>     | NR (NR)                                                     | NR             | NR                 | Unclear                           | Unclear | Unclear | Unclear | Yes | Yes | Yes                         | Unclear                     | √                           | -                               | √       | -       |
| Tudor-Locke et al 2004 <sup>36</sup> | NR (NR)                                                     | n=22 (37%)     | NR                 | Unclear                           | Unclear | Unclear | Yes     | Yes | Yes | Yes                         | Unclear                     | √                           | √                               | -       | -       |
| Wisse et al 2010 <sup>37</sup>       | NR (NR)                                                     | n=13 (18%)     | NR                 | Unclear                           | Unclear | Yes     | Yes     | Yes | Yes | Yes                         | Unclear                     | √                           | -                               | √       | √       |
|                                      |                                                             |                |                    |                                   |         |         |         |     |     |                             | Risk of bias across studies | Unclear                     | Low                             | Unclear | Unclear |

NR = Not Reported. A = adequate sequence generation; B = allocation concealment; C = blinding/masking; D = incomplete outcome data addressed; E = free of selective outcome reporting; F = study free of other problems.

SUPPLEMENTARY DATA

**Supplementary Table 4.** Treatment fidelity assessment

| Study ID                             | Treatment Fidelity Strategies |                                            |                                                |                                               |                                                        |
|--------------------------------------|-------------------------------|--------------------------------------------|------------------------------------------------|-----------------------------------------------|--------------------------------------------------------|
|                                      | Design of study               | Monitoring and improving provider training | Monitoring and improving delivery of treatment | Monitoring and improving receipt of treatment | Monitoring and improving enactment of treatment skills |
| Balducci et al 2010 <sup>21</sup>    | Yes                           | Yes                                        | Yes                                            | Yes                                           | Yes                                                    |
| Balducci et al 2010 <sup>22</sup>    | Yes                           | No                                         | Yes                                            | Yes                                           | Yes                                                    |
| Cheung et al 2009 <sup>23</sup>      | Yes                           | No                                         | Unclear                                        | Yes                                           | Yes                                                    |
| De Greef et al 2010 <sup>24</sup>    | Yes                           | No                                         | Yes                                            | Yes                                           | Yes                                                    |
| De Greef et al 2011 <sup>25</sup>    | Yes                           | Yes                                        | Yes                                            | Yes                                           | Yes                                                    |
| De Greef et al 2011 <sup>26</sup>    | Yes                           | No                                         | Yes                                            | Yes                                           | Yes                                                    |
| Di Loreto et al 2003 <sup>27</sup>   | Yes                           | No                                         | Yes                                            | Yes                                           | Yes                                                    |
| Gram et al 2010 <sup>28</sup>        | Yes                           | No                                         | Unclear                                        | Yes                                           | Yes                                                    |
| Kim & Kang 2006 <sup>29</sup>        | Yes                           | Unclear                                    | Yes                                            | Yes                                           | Yes                                                    |
| Kirk et al 2004 <sup>30</sup>        | Yes                           | Unclear                                    | Yes                                            | Yes                                           | Yes                                                    |
| Kirk et al 2009 <sup>31</sup>        | Yes                           | Unclear                                    | Yes                                            | Yes                                           | Yes                                                    |
| Ligtenberg et al 1997 <sup>32</sup>  | Yes                           | No                                         | Unclear                                        | Yes                                           | Yes                                                    |
| Plotnikoff et al 2010 <sup>33</sup>  | Yes                           | No                                         | Yes                                            | Yes                                           | Yes                                                    |
| Plotnikoff et al 2011 <sup>34</sup>  | Yes                           | No                                         | Yes                                            | Yes                                           | Yes                                                    |
| Samaras et al 1997 <sup>35</sup>     | Yes                           | No                                         | Yes                                            | Yes                                           | Yes                                                    |
| Tudor-Locke et al 2004 <sup>36</sup> | Yes                           | No                                         | Yes                                            | Yes                                           | Yes                                                    |
| Wisse et al 2010 <sup>37</sup>       | Yes                           | No                                         | Yes                                            | Yes                                           | Yes                                                    |

Yes = a treatment fidelity strategy was reported and described; Unclear = insufficient information to make a judgement about the presence or absence of a treatment fidelity strategy; No = treatment fidelity strategy not reported

SUPPLEMENTARY DATA

**Supplementary Table 5.** Behavior change techniques utilized across 17 Randomized Control Trials targeting physical activity/exercise in adults with type 2 diabetes.

|                                                                        | Frequency |
|------------------------------------------------------------------------|-----------|
| Goal setting (behaviour) [5]                                           | 17        |
| Use of follow-up prompts [27]                                          | 16        |
| Prompt self-monitoring of behaviour [16]                               | 16        |
| Barrier identification/problem solving [8]                             | 15        |
| Provide instruction on how to perform the behaviour [21]               | 15        |
| Prompt review of behavioural goals [10]                                | 14        |
| Plan social support/social change [29]                                 | 13        |
| Relapse prevention/coping planning [35]                                | 11        |
| Provide information on consequences of behaviour in general [1]        | 10        |
| Set graded tasks [9]                                                   | 10        |
| Provide information on where and when to perform the behaviour [20]    | 10        |
| Time management [38]                                                   | 8         |
| Provide feedback on performance [19]                                   | 7         |
| Action planning [7]                                                    | 6         |
| Provide information on consequences of behaviour to the individual [2] | 5         |
| Prompting generalisation of a target behaviour [15]                    | 5         |
| Prompting focus on past success [18]                                   | 4         |
| Teach to use prompts/cues [23]                                         | 4         |
| Goal setting (outcome) [6]                                             | 3         |
| Prompt rewards contingent on effort or progress towards behaviour [12] | 3         |
| Motivational interviewing [37]                                         | 3         |
| Prompt self-monitoring of behavioural outcome [17]                     | 2         |
| Provide rewards contingent on successful behaviour [13]                | 1         |
| Model/demonstrate the behaviour [22]                                   | 1         |
| Prompt practice [26]                                                   | 1         |
| Provide information about others' approval [3]                         | 0         |
| Provide normative information about others' behaviour [4]              | 0         |
| Prompt review of outcome goals [11]                                    | 0         |
| Shaping [14]                                                           | 0         |
| Environmental restructuring [24]                                       | 0         |
| Agree behavioural contract [25]                                        | 0         |
| Facilitate social comparison [28]                                      | 0         |
| Prompt identification as role model/position advocate [30]             | 0         |
| Prompt anticipated regret [31]                                         | 0         |
| Fear arousal [32]                                                      | 0         |
| Prompt self talk [33]                                                  | 0         |
| Prompt use of imagery [34]                                             | 0         |
| Stress management/emotional control training [36]                      | 0         |
| General communication skills training [39]                             | 0         |
| Stimulate anticipation of future rewards [40]                          | 0         |

NB: The frequencies for BCTs include those from each intervention arm compared with the usual care arm across all 17 RCTs. Number in squared brackets corresponds with the code assigned to each behavior change technique described in the taxonomy <sup>(19)</sup>

**Supplementary Figure 1.** PRISMA Diagram showing the process used to identify RCTs

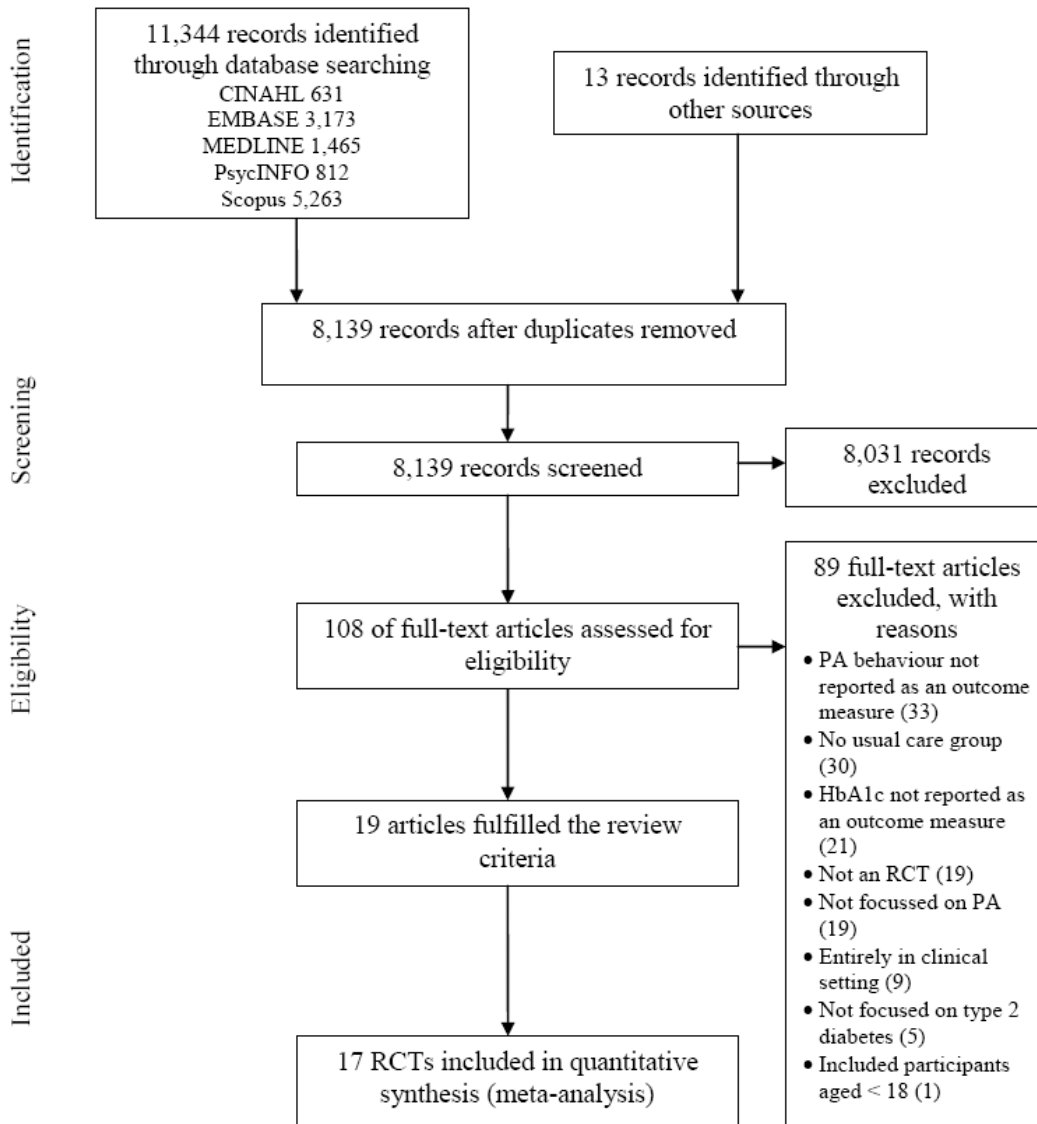

SUPPLEMENTARY DATA

Supplementary Figure 2. Forest plot for self-reported physical activity and exercise.

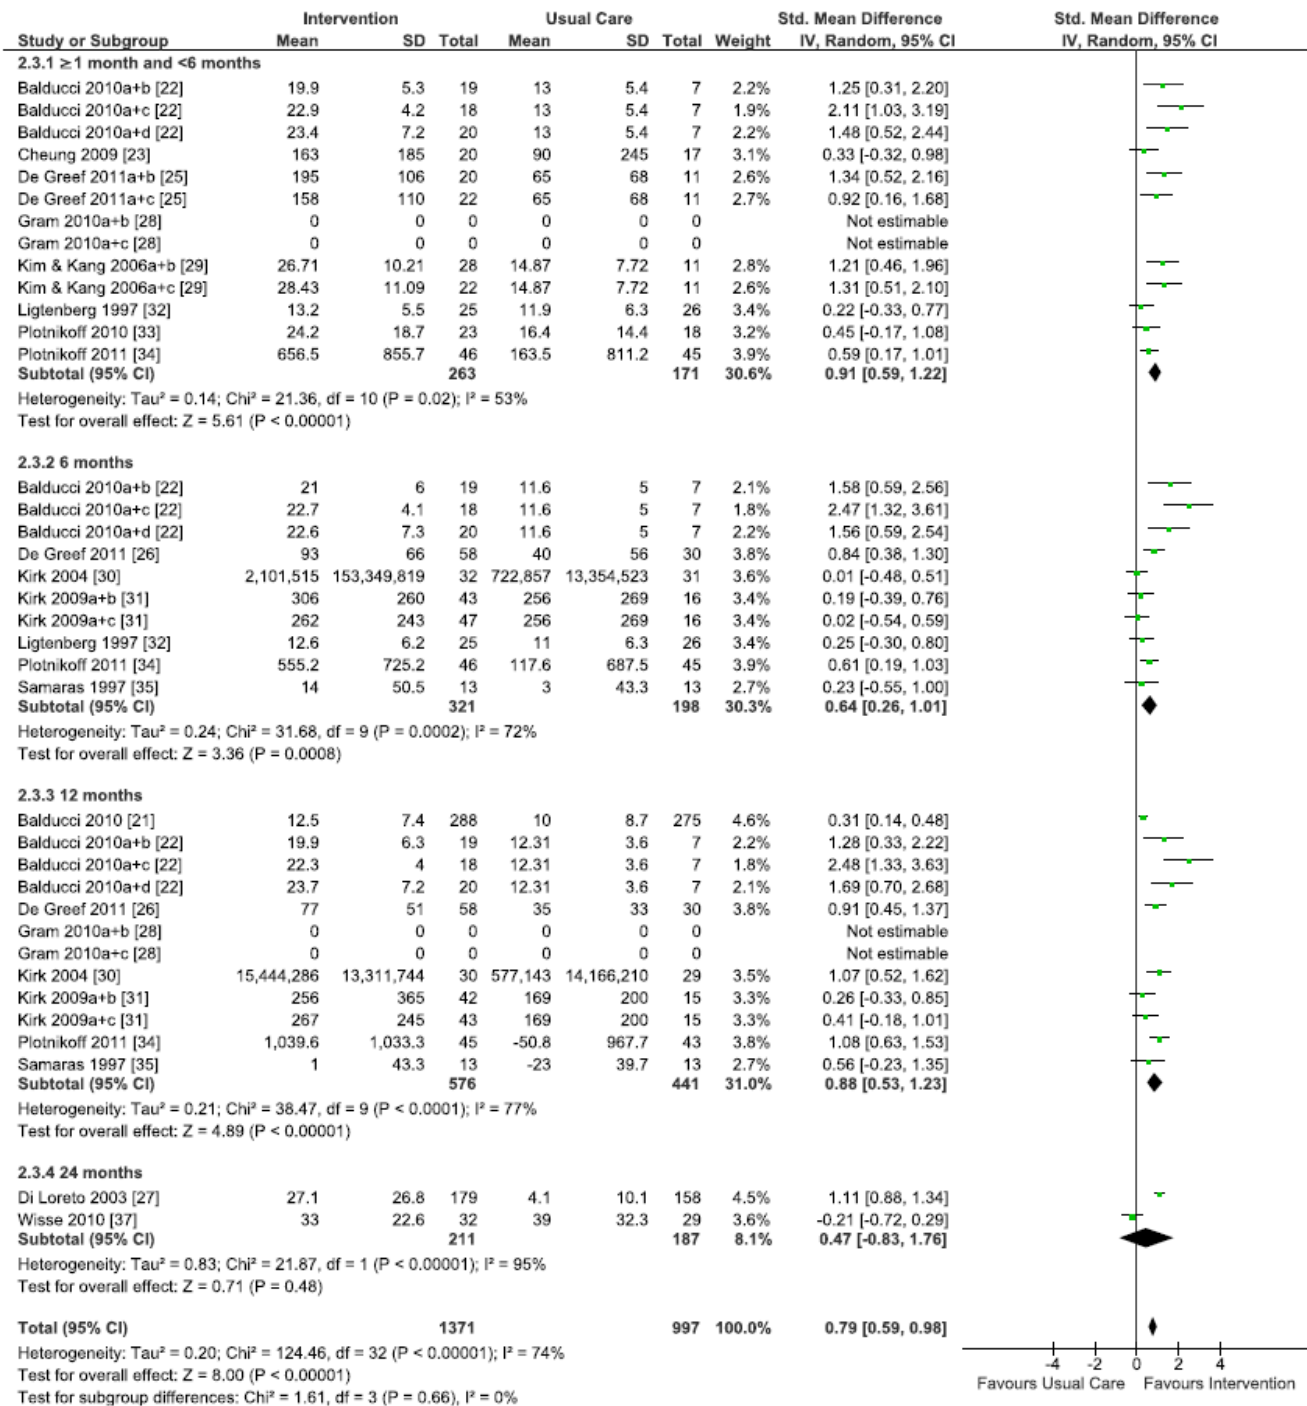

SUPPLEMENTARY DATA

Supplementary Figure 3. Forest plot for Body Mass Index (BMI).

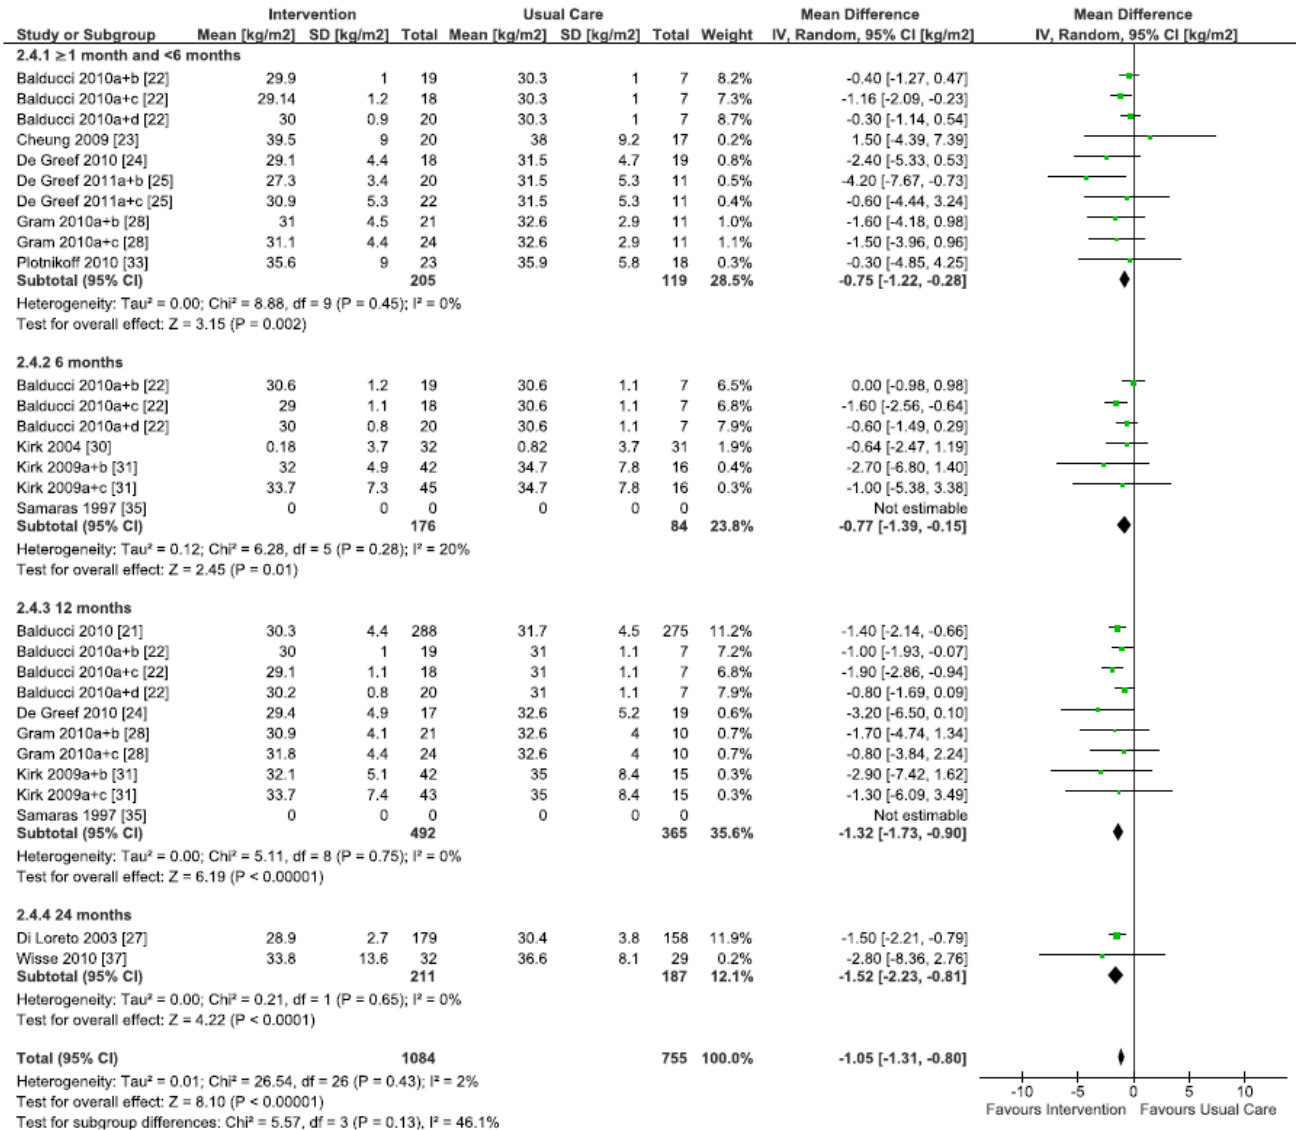

Supplement: dc112452supplementarydata.pdf [file dc112452supplementarydata.pdf]
